# Supplementary material for: Territory, enclosure, and state territorial mode of production in the Russian imperial periphery
Source: Copernicus journal article supplement (doi:10.5194/gh-74-13-2019), 2019-01-16
Supplement: Supplementary file 1 [file gh-74-13-2019-supplement.pdf]

Supplement of Geogr. Helv., 74, 13–25, 2019  
<https://doi.org/10.5194/gh-74-13-2019-supplement>  
© Author(s) 2019. This work is distributed under  
the Creative Commons Attribution 4.0 License.

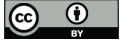

+ GEOGRAPHICA  
HELVETICA +

supported by  
sc|nat

*Supplement of*

## **Territory, enclosure, and state territorial mode of production in the Russian imperial periphery**

**Vera Smirnova**

*Correspondence to:* Vera Smirnova (veras@vt.edu)

The copyright of individual parts of the supplement might differ from the CC BY 4.0 License.



О П И С А Н И Е Х У Т О Р А

Годъ 1909 г.

П р о з в и щ е е г о о р г а н и з а ц и и .

М и с с и я .

|                          |                                           |                     |                               |
|--------------------------|-------------------------------------------|---------------------|-------------------------------|
| Община                   | Московская                                | Название селения    |                               |
| Уездъ                    | Волоколамскій                             | или                 |                               |
| Местъ                    | Серединская.                              | хутора.             | Дзюковскій                    |
| Владелец                 | Силинъ                                    | Видъ земли          | Видъ земли                    |
| Участокъ                 | Тимофеевъ                                 | приобретенъ ли и у  | Приобретенъ при               |
| Сельские хозяева         | Тарасовъ.                                 | кого куплено (чуждъ | посредствъ Крестовскаго Банка |
| Въ какомъ уездѣ губерніи | Московской г.                             | или куплено (чуждъ  | А. П. Андреева.               |
| Въ какомъ уездѣ губерніи | Волоколамского уезда, Яропольской вол. д. | или куплено (чуждъ  |                               |
| Въ какомъ уездѣ губерніи | Волоколамского уезда, Яропольской вол. д. | или куплено (чуждъ  |                               |

Н а з в а н і е ч а с т и .

Ч а с т и .

- 1) усадьба а) усадьба  
б) огородъ  
в) пашни  
г) луга сенокосные  
д) луга сенокосные  
е) луга сенокосные  
ж) луга сенокосные  
з) луга сенокосные  
и) луга сенокосные  
к) луга сенокосные  
л) луга сенокосные  
м) луга сенокосные  
н) луга сенокосные  
о) луга сенокосные  
п) луга сенокосные  
р) луга сенокосные  
с) луга сенокосные  
т) луга сенокосные  
у) луга сенокосные  
ф) луга сенокосные  
х) луга сенокосные  
ц) луга сенокосные  
ч) луга сенокосные  
ш) луга сенокосные  
щ) луга сенокосные  
ъ) луга сенокосные  
ы) луга сенокосные  
э) луга сенокосные  
ю) луга сенокосные  
я) луга сенокосные

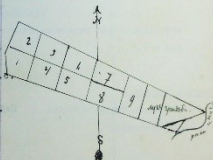

Итого 12 дес.

Масштабъ въ арт. д. 100 саж.

П о ч в а .

Видъ (глинистая, суглинистая, песчаная, подзолистая и т. д.) Суглинистая.

Влажность (сухая, влажная, болотистая и т. д.) Влажная.

Плодородность (высокая, средняя, низкая и т. д.) Средняя.

Какое растение на участѣ воздѣлывается?

Какая была сѣва?

Какой была сѣва?

Сѣдкинъ о прожитыхъ урокахъ

Удобралась ли почва и чѣмъ Н ѣ т .

Видъ. Качество луга. Влажность, сухость и болотность, плодородность, составъ травъ (преобладающее видъ) уносъ (въ пуд. съ десятины) въ среднемъ 100 пуд.

Видъ. Преобладающая порода

Возрастъ

Возрастъ

Возрастъ

Можетъ ли удовлетворить топлинныя

Можетъ ли удовлетворить топлинныя

Можетъ ли удовлетворить топлинныя

Можетъ ли удовлетворить топлинныя

Рельефъ участка.

а) Склонъ (куда обращенъ) Небольшой склонъ на сѣв-востокъ.

или крутизна).

Водоснабженіе.

Обеспеченность питьевой водой,

водоснабженіе.

Рѣка И н о ч ь .

Возвращается ли необходимость Участокъ нуждается въ общей осушкѣ при помощи проритія канавъ.



# ПОДВОРНОЕ НАДѢЛЕНИЕ.

Распределение земли деревни Ловмейки, Ковенской губернии, Поневѣжскаго уѣзда, Нащюнской волости, до разверстанія съ посторонними владѣльцами.

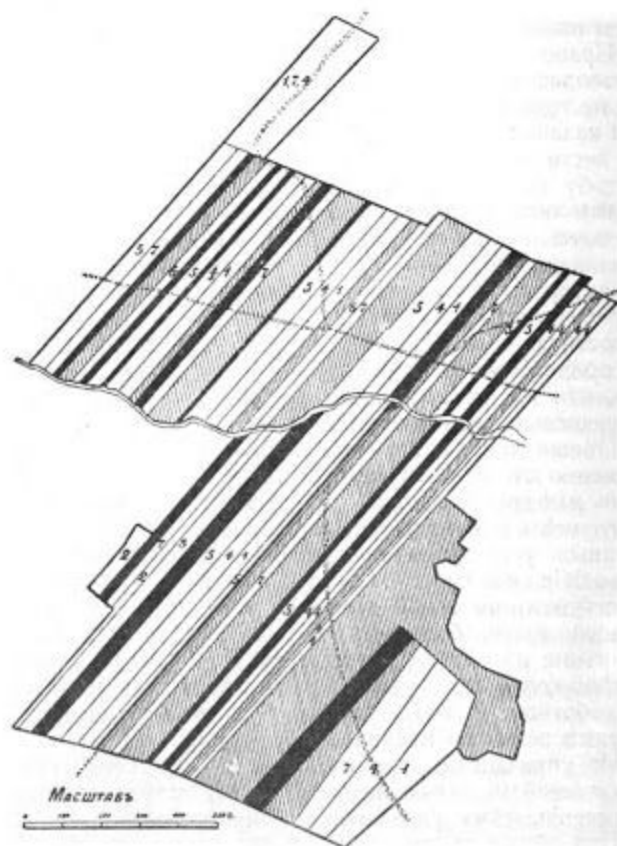

Планъ. № 2.

# ПОДВОРНОЕ НАДѢЛЕНИЕ.

Распределение земли деревни Ловмейки, Ковенской губернии, Поневѣжскаго уѣзда, Нащюнской волости, послѣ разверстанія съ посторонними владѣльцами и разбивки надѣльной земли на хуторскіе участки.

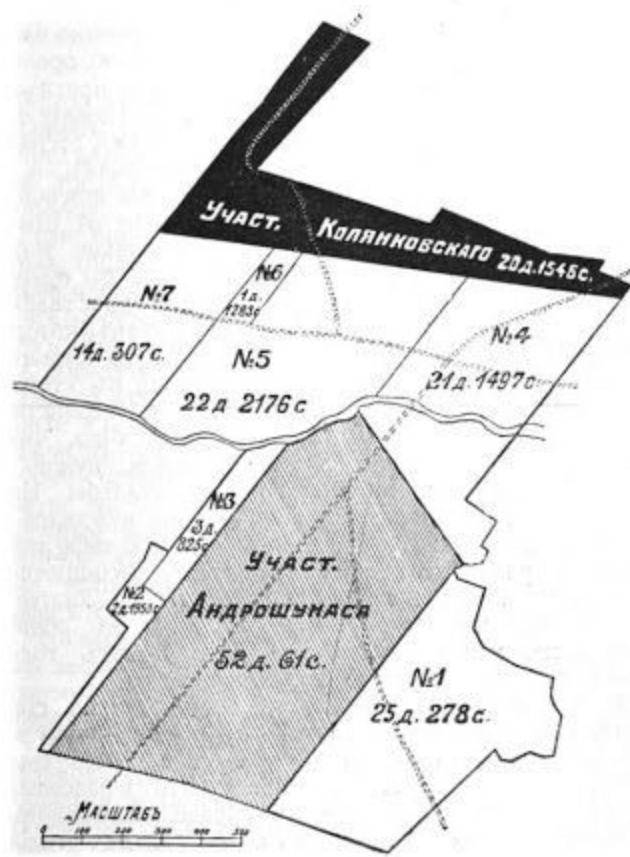

# ПОДВОРНОЕ НАДѢЛЕНИЕ.

Распределение земли деревни Гимбуце, Ковенской губернии, Шавельского уѣзда, Жагорской волости, до хуторского разселения.

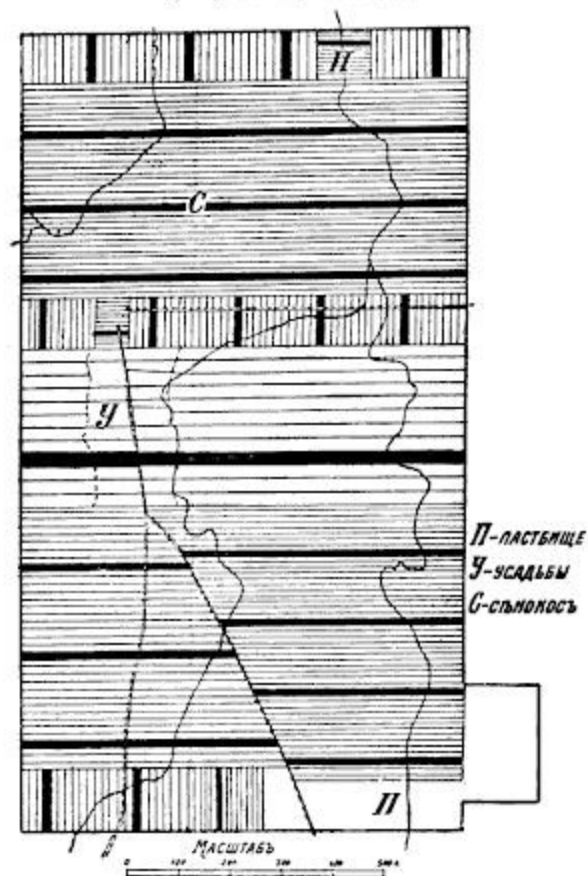

Планъ № 11.

# ПОДВОРНОЕ НАДѢЛЕНИЕ.

Планъ хуторскихъ участковъ въ деревнѣ Гимбуце, Ковенской губернии, Шавельскаго уѣзда, Жагорской волости.  
Надѣленныхъ дворовъ—12. Наличныхъ дворовъ—16.

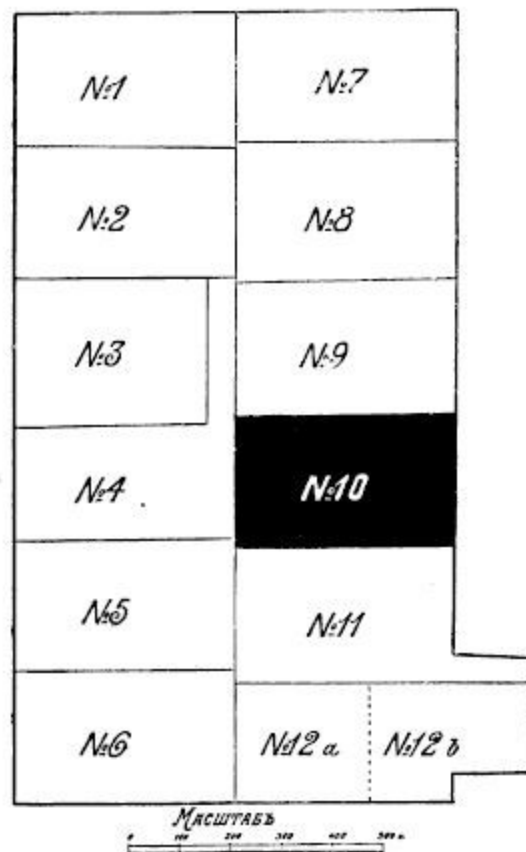

Планъ № 12.
